# Supplementary material
Source: PubMed Central journal article supplement (PMC4301149)
Supplement: JVI.02382-14_zjv999099915so1.pdf [file JVI.02382-14_zjv999099915so1.pdf]

| Category                                                         | n  | Fem/Total | % Female | Age (Med, IQR)  |
|------------------------------------------------------------------|----|-----------|----------|-----------------|
| HIV(-)                                                           | 33 | 8/33      | 0.242    | 43.5 (28.5-54)* |
| HIV(+) Lo (<Log4.6)                                              | 14 | 3/14      | 0.214    | 46 (30-53)      |
| HIV(+) Hi (>Log4.6)                                              | 21 | 1/21      | 0.048    | 40 (27.5-47)    |
|                                                                  |    |           |          |                 |
| *Age information in the HIV(-) group available for 22/33 donors. |    |           |          |                 |

**Supplemental Table 1: Gender and age of donor population.**

**A**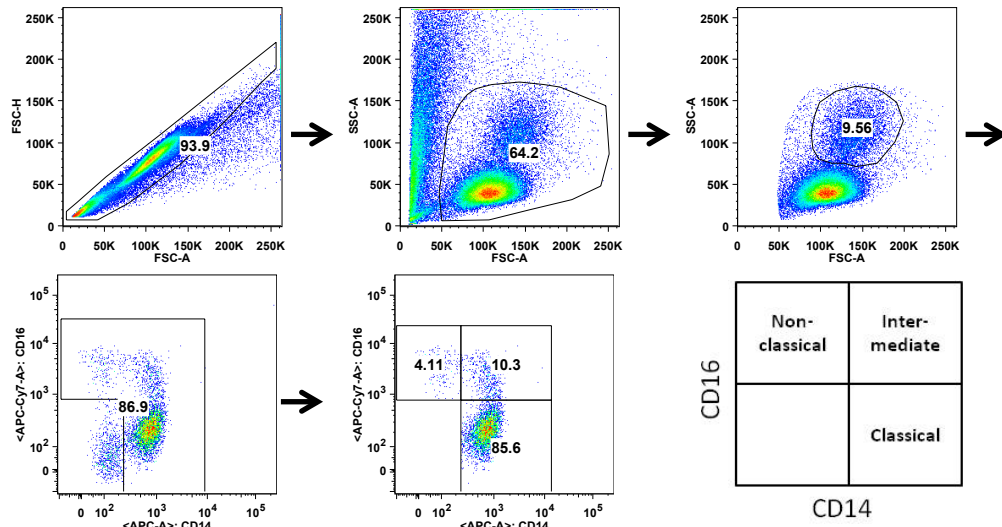**B**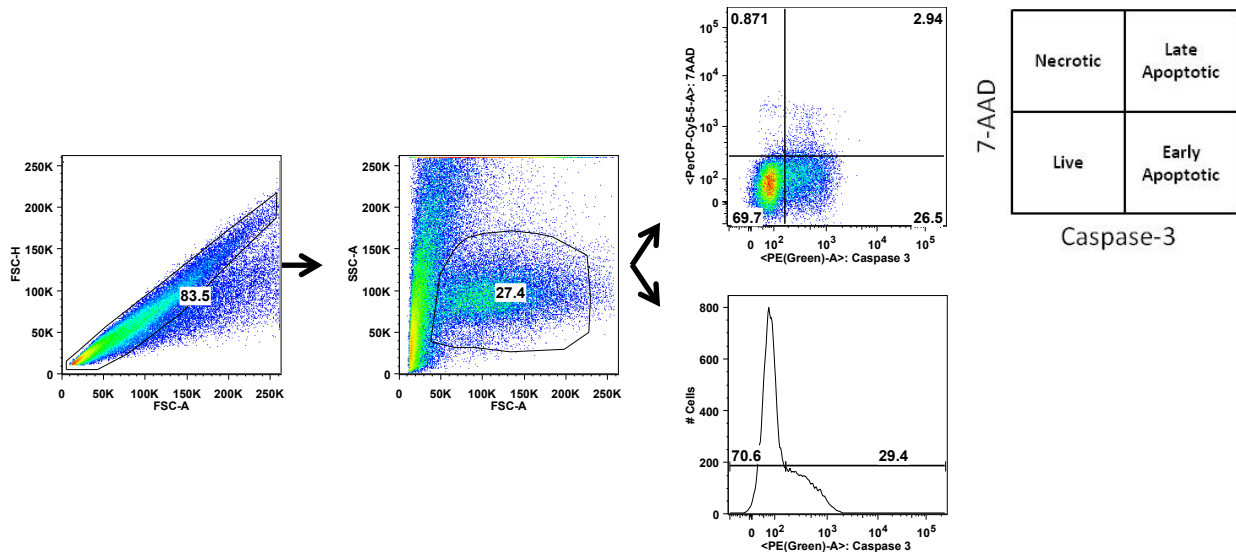

**Supplemental Figure 1: Monocyte subset definition and apoptosis gating by flow cytometry.** (A) PBMC gated on singlets, live cells, monocytes by scatter profile, and CD14/CD16 into non-classical (CD14+/CD16++), intermediate (CD14+/CD16+), and classical (CD14++/CD16-) monocyte subsets. (B) Negatively purified monocytes gated on singlets, intact cells, and subject to apoptosis determination via 7-AAD and caspase-3 positive staining. Percent apoptotic cells counted as total caspase-3 positive cells (bottom right and top right quadrants).

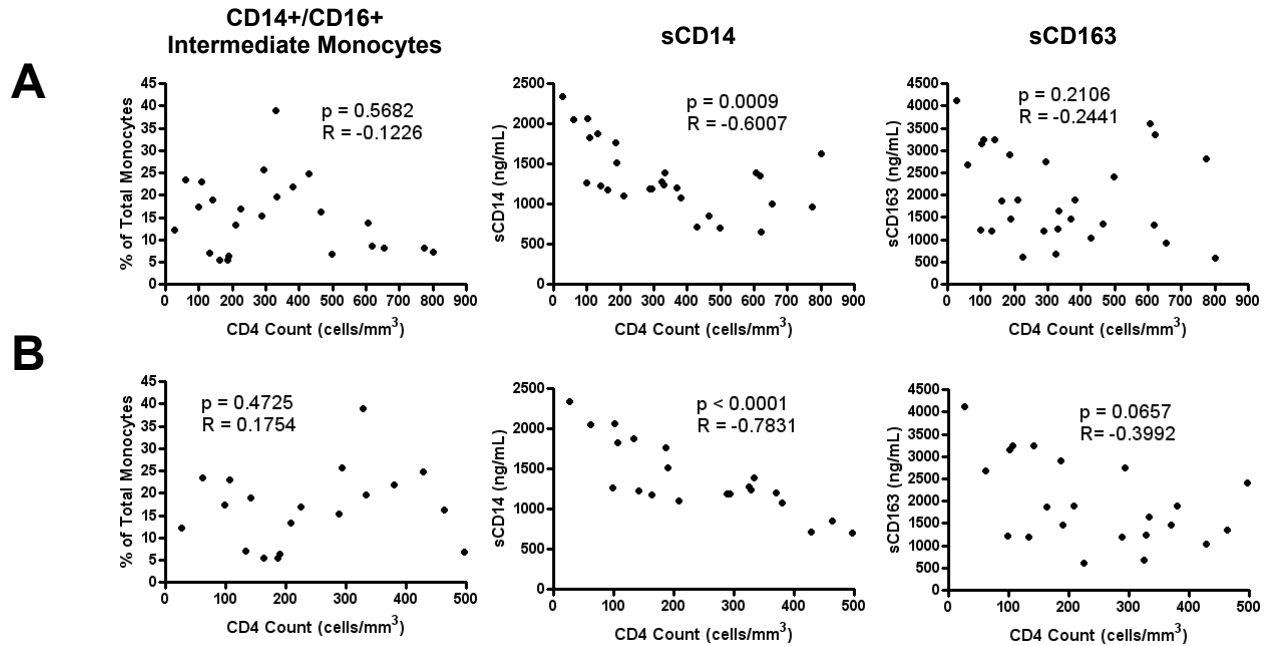

**Supplemental Figure 2: Monocyte/macrophage activation and CD4 count in HIV(+) patient cohort.** (A-B) Spearman ranked correlation of CD4 count with percentage of intermediate CD14+/CD16+ monocytes (left), plasma sCD14 (middle), and plasma sCD163 (right) in (A) total HIV(+) cohort and (B) HIV(+) patients below CD4 count of 500 cells/mm<sup>3</sup>. Spearman (two-tailed) Rho and p-values displayed with  $p < 0.05$  considered significant.
